# Supplementary material for: A molecular dynamics study on the tribological behavior of molybdenum disulfide with grain boundary defects during scratching processes
Source: Springer Nature journal article supplement (doi:10.1007/s40544-020-0459-z), 2020-11-20
Supplement: 40544_2020_459_MOESM1_ESM.pdf [file 40544_2020_459_MOESM1_ESM.pdf]

## Electronic Supplementary Material

# A molecular dynamics study on the tribological behavior of molybdenum disulfide with grain boundary defects during scratching processes

Boyu WEI<sup>1</sup>, Ning KONG<sup>1,\*</sup>, Jie ZHANG<sup>1</sup>, Hongbo LI<sup>1</sup>, Zhenjun HONG<sup>1</sup>, Hongtao ZHU<sup>2</sup>, Yuan ZHUANG<sup>3</sup>, Bo WANG<sup>3</sup>

<sup>1</sup>School of Mechanical Engineering, University of Science and Technology Beijing, Beijing 100083, China

<sup>2</sup>School of Mechanical, Materials & Mechatronics Engineering, University of Wollongong, Wollongong, NSW 2522, Australia

<sup>3</sup>Beijing Institute of Spacecraft System Engineering, Beijing 100094, China

Supporting information to <https://doi.org/10.1007/s40544-020-0459-z>

### 1 Thermostatting scheme

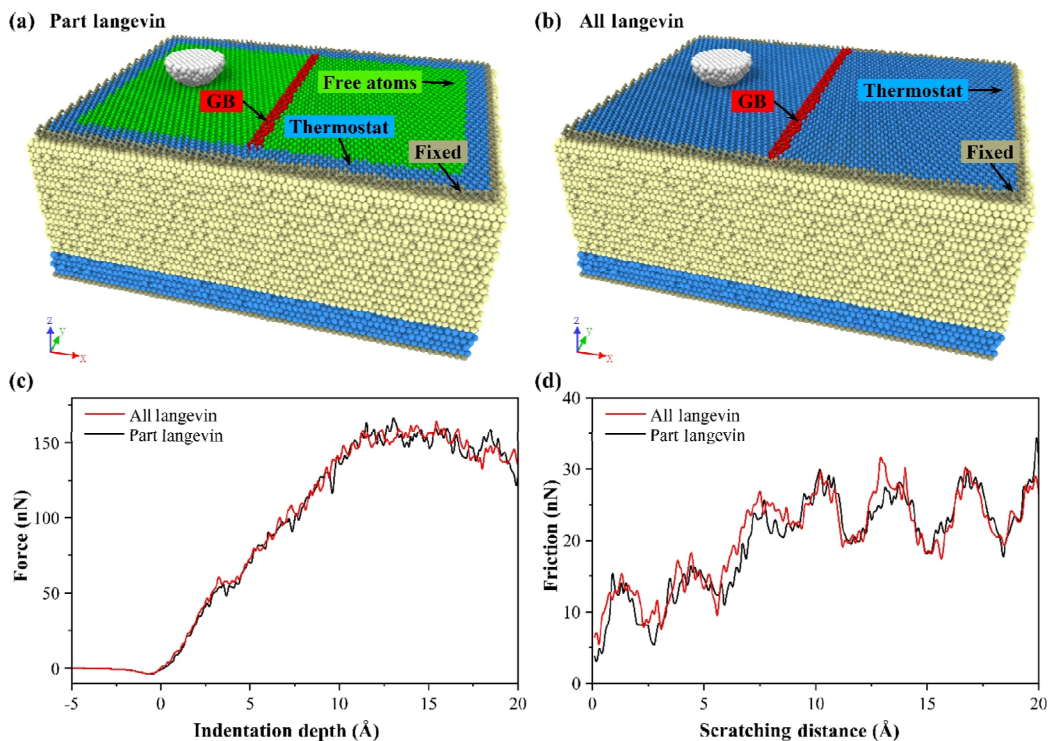

**Fig. S1** Schematic of two thermostat schemes: (a) Part Langevin (the Langevin thermostat is only applied to the MoS<sub>2</sub> atoms close to the fixed region) and (b) All Langevin (the Langevin thermostat is applied to all free atoms from the MoS<sub>2</sub> layer). Part Langevin is adopted in this work. For both schemes, the thermostatting regions in the Pt substrate are the same as that in the main manuscript. (c) Force–depth relations of the MoS<sub>2</sub>/Pt substrate during nano-indentation process using Part Langevin and All Langevin. (d) Friction–distance curves of the MoS<sub>2</sub>/Pt substrate during nano-scratch process using Part Langevin and All Langevin. The thermostat scheme in this work does not show artificial effects on the simulation results.

\* Corresponding author: Ning KONG, E-mail: kongning@ustb.edu.cn

## 2 Model

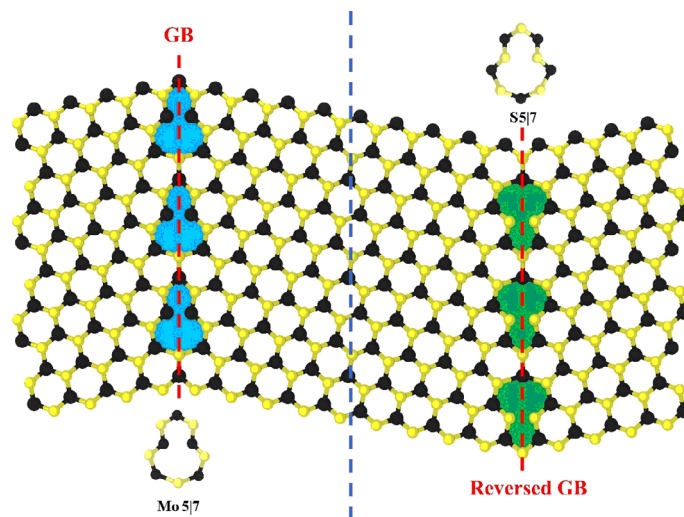

**Fig. S2** Schematic of the GB consisting of Mo5|7 dislocation cores and the reversed GB consisting of S5|7 dislocation cores.

## 3 The parameters of LJ potentials

**Table S1** Parameters of LJ potentials used in the simulation.

| Parameter | $\epsilon$ (meV) | $\sigma$ (Å) | Rcutoff (Å) |
|-----------|------------------|--------------|-------------|
| C–S       | 13.165           | 3.418        | 8.545       |
| C–Mo      | 48.962           | 3.009        | 7.523       |
| C–Pt      | 38.635           | 2.971        | 7.428       |
| S–Pt      | 177.840          | 2.922        | 7.305       |
| Mo–Pt     | 661.41           | 2.513        | 6.283       |

## 4 Indentation points and scratching lines

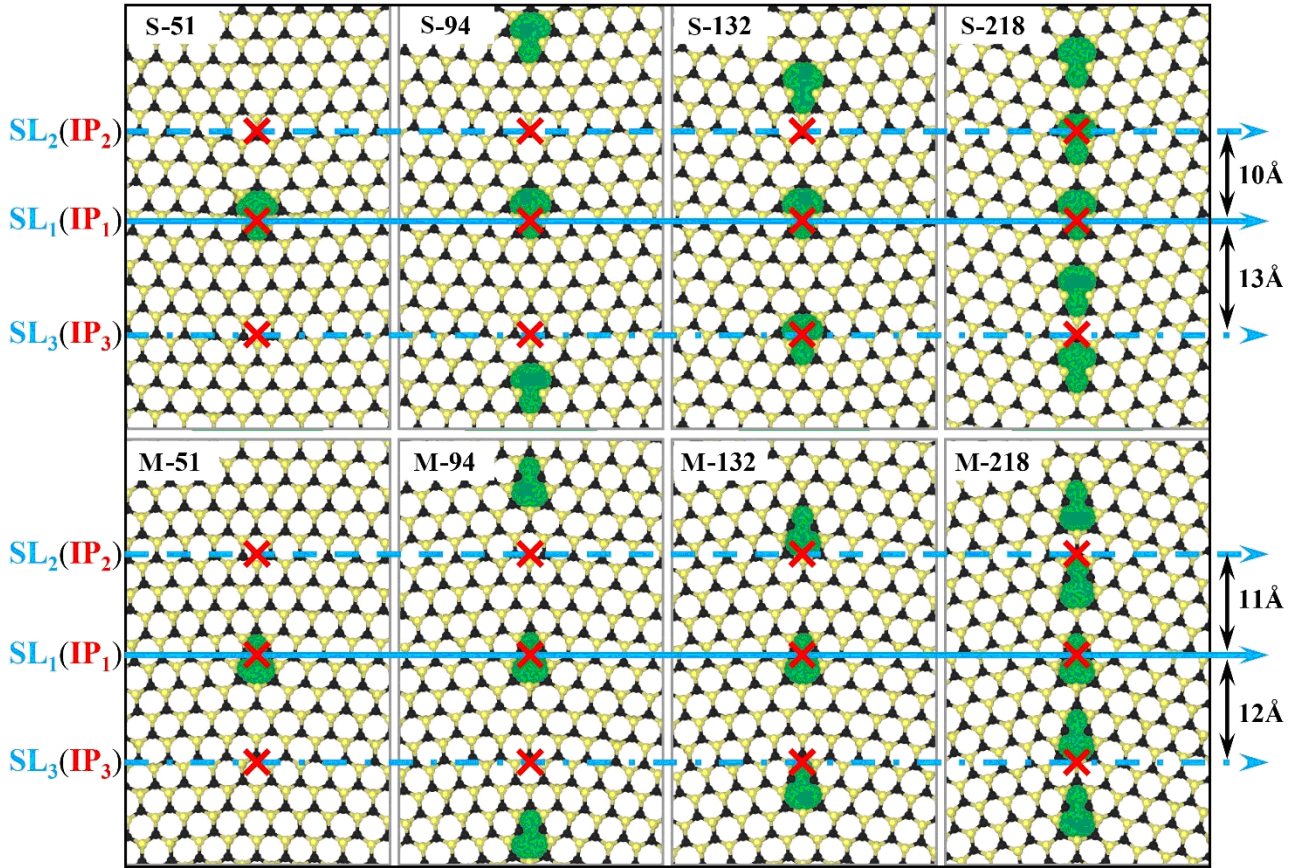

**Fig. S3** Schematic of indentation points (IP) and scratching lines (SL) on the MoS<sub>2</sub>. Without further mention, the results in this manuscript are based on scratching line 1 (SL<sub>1</sub>) and indentation point 1 (IP<sub>1</sub>).

## 5 Critical normal load of indentation and scratching

**Table S2** Critical normal loads of indentation and scratching.

| Model | Critical normal load of indentation (nN) |                 |                 |       | Critical normal load of scratching (nN) |                 |                 |       |
|-------|------------------------------------------|-----------------|-----------------|-------|-----------------------------------------|-----------------|-----------------|-------|
|       | IP <sub>1</sub>                          | IP <sub>2</sub> | IP <sub>2</sub> | AVE   | SL <sub>1</sub>                         | SL <sub>2</sub> | SL <sub>3</sub> | AVE   |
| S-51  | 78.65                                    | 74.31           | 80.09           | 77.68 | 68.51                                   | 62.37           | 65.24           | 65.37 |
| S-94  | 83.40                                    | 78.69           | 84.17           | 82.09 | 77.83                                   | 70.29           | 74.75           | 74.29 |
| S-132 | 89.11                                    | 88.25           | 85.33           | 87.56 | 79.21                                   | 77.09           | 77.98           | 78.09 |
| S-218 | 90.33                                    | 93.64           | 95.34           | 93.10 | 82.57                                   | 81.69           | 86.80           | 83.69 |
| M-51  | 87.21                                    | 81.47           | 89.16           | 85.95 | 73.45                                   | 69.77           | 75.09           | 72.77 |
| M-94  | 89.43                                    | 85.29           | 92.82           | 89.18 | 79.77                                   | 75.66           | 77.56           | 77.66 |
| M-132 | 90.40                                    | 93.11           | 95.31           | 92.94 | 84.16                                   | 80.94           | 83.71           | 82.94 |
| M-218 | 99.50                                    | 98.65           | 99.78           | 99.31 | 89.63                                   | 87.40           | 91.16           | 89.40 |

## 6 Combined effect of pushing and interlocking actions

**Table S3** Interaction force between the specific tip atoms and MoS<sub>2</sub> atoms in M-51 model.

| Time (ps) | Interaction | X component (nN) | Y component (nN) | Angle (°) | Resultant force (nN) |
|-----------|-------------|------------------|------------------|-----------|----------------------|
| 445       | A → 1       | -2.32            | 1.26             | 151.50    | 2.64                 |
|           | A → 2       | 3.07             | 0.61             | 11.24     | 3.13                 |
|           | B → 3       | 0.96             | 2.68             | 70.32     | 2.85                 |
| 470       | A → 2       | 1.13             | 4.63             | 76.30     | 4.77                 |
|           | B → 3       | -0.87            | 0.81             | 136.98    | 1.19                 |
|           | B → 4       | 4.22             | 2.11             | 26.61     | 4.72                 |
| 505       | C → 5       | -0.53            | -0.76            | -124.74   | 0.93                 |
|           | C → 6       | 0.47             | -1.04            | -65.65    | 1.14                 |

**Table S4** Interaction force between the specific tip atoms and MoS<sub>2</sub> atoms in S-51 model.

| Time (ps) | Interaction | X component (nN) | Y component (nN) | Angle (°) | Resultant force (nN) |
|-----------|-------------|------------------|------------------|-----------|----------------------|
| 430       | A → 1       | 3.12             | 1.99             | 32.52     | 3.7                  |
|           | A → 3       | 1.37             | 2.56             | -61.81    | 2.9                  |
| 455       | A → 2       | 2.11             | 1.52             | 35.75     | 2.6                  |
|           | C → 5       | 1.89             | 1.48             | -38.05    | 2.4                  |
| 505       | C → 6       | 1.95             | 2.41             | -51.02    | 3.1                  |

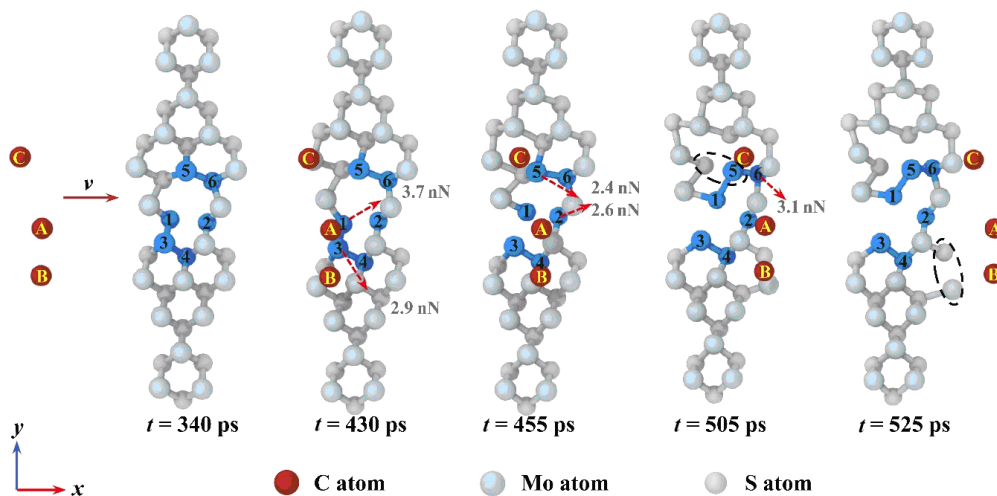

**Fig. S4** Schematic of the specific tip atoms and MoS<sub>2</sub> atoms of S-51 Model during the scratching process at the load depth of 5.1 Å. The representative atoms and bonds were marked by blue color, black dotted circles, and red dashed arrows to help tracking the bond-breaking process.

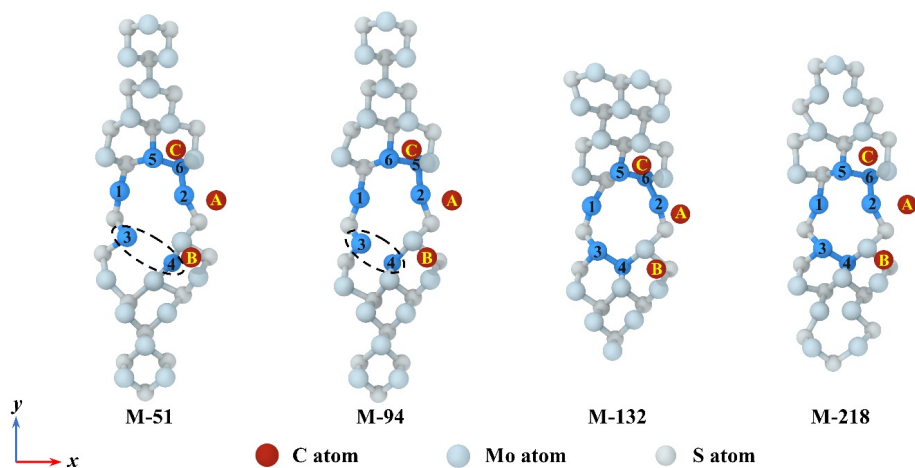

**Fig. S5** Schematic of the specific tip atoms and MoS<sub>2</sub> atoms of Mo5/7 cores-containing models when the scratching time is 505 ps at the load depth of 5.4 Å. The top S layer is hidden to show the structural changes of MoS<sub>2</sub> clearly. The representative atoms of the tip and MoS<sub>2</sub> were marked by red and blue color, respectively. The broken bonds were marked by black circle.

## 7 The tribological behavior of GB defects-containing MoS<sub>2</sub>

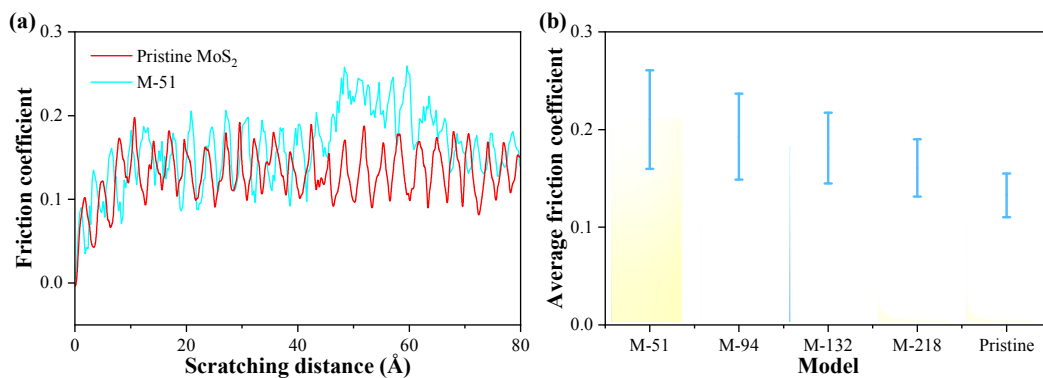

**Fig. S6** (a) Relationship between friction coefficient and scratching depth and (b) average friction coefficient of pristine MoS<sub>2</sub> and Mo5/7 cores-containing models at a scratching depth of 5.4 Å.

8 Wear mechanism of MoS<sub>2</sub> with S5|7-containing GB defects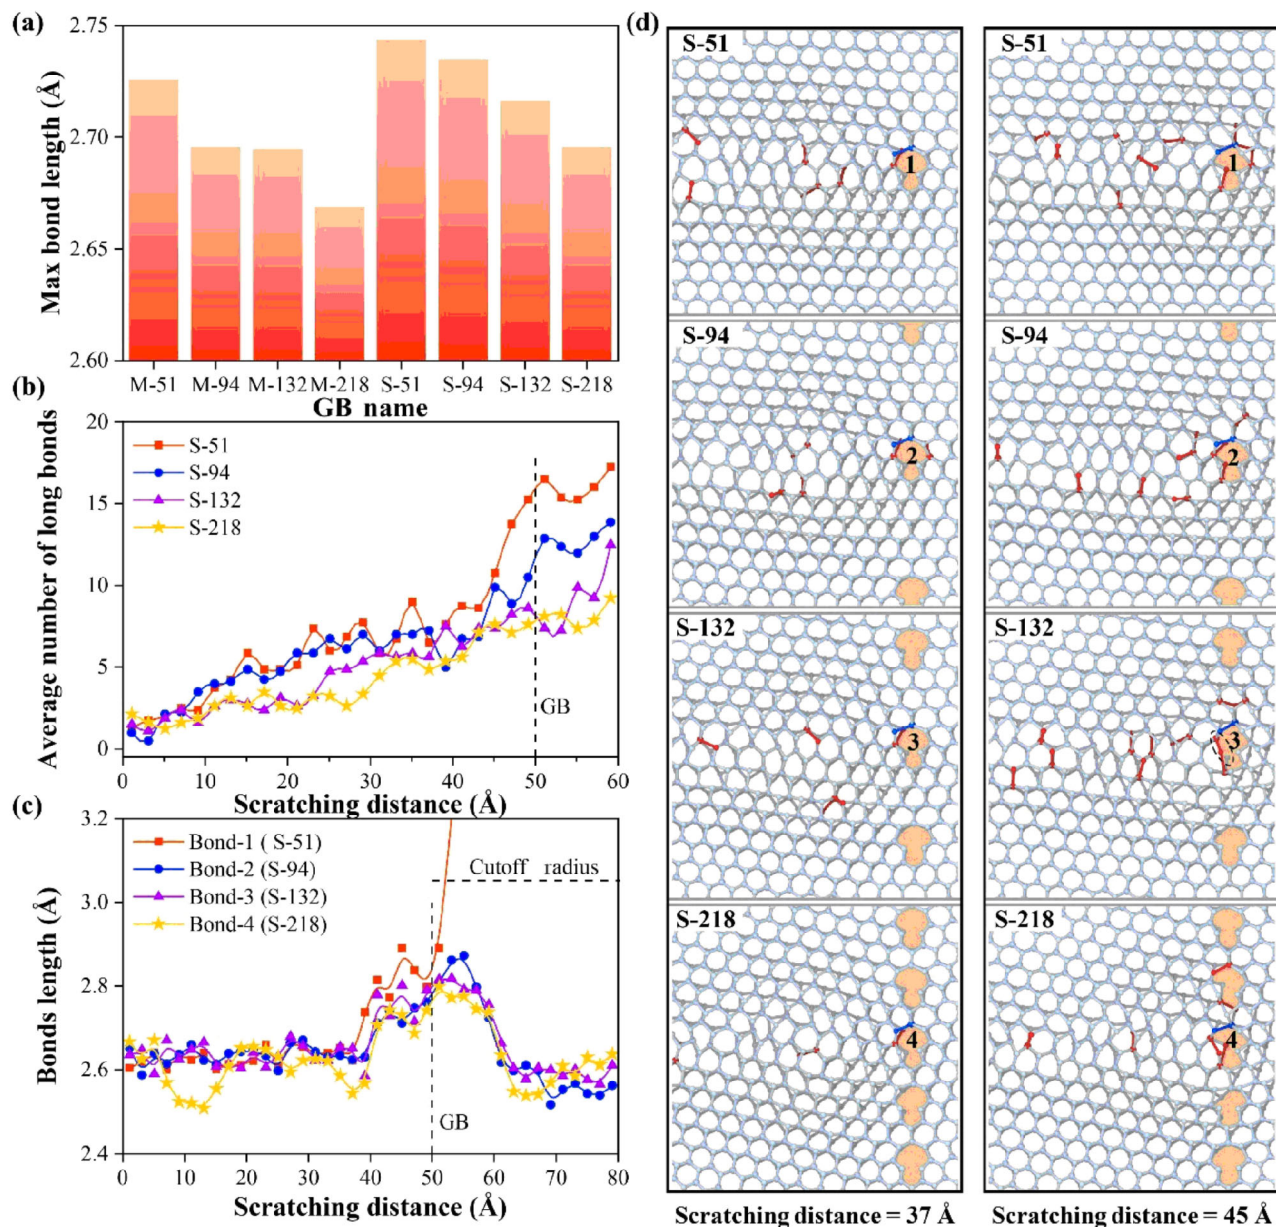

**Fig. S7** (a) Longest pre-strain Mo-S bond length of Mo5|7 and S5|7 cores-containing models at equilibrium. (b) Average number of long Mo-S bonds as a function of the scratching distance before MoS<sub>2</sub> starts to break in S-51 model. The number of long bonds is averaged with an interval of 1 Å. The diamond tip is positioned at an initial distance of 50 Å from the GB along the x direction. (c) Relationship between the length of the critical bond 1-4 and scratching distance. (d) At the load depth of 5.1 Å, the distributions of the long Mo-S bonds for S-51, S-94, S-132, and S-218 models at two sliding distances of 37 and 45 Å, respectively. The long Mo-S bonds are marked in red, and the S5|7 defects along the GBs are colored in bisque. The critical bonds within GBs are numbered by 1-4 and highlighted in blue.

## 9 Weakening the negative effects of GB defects on the tribological properties of MoS<sub>2</sub>

**Table S5** Work of adhesion for M-51 and S-51 models with different LJ parameters.

|      | Work of adhesion for M-51 (J/m <sup>2</sup> ) | Work of adhesion for S-51 (J/m <sup>2</sup> ) |
|------|-----------------------------------------------|-----------------------------------------------|
| LJ-1 | 1.0283                                        | 1.0295                                        |
| LJ-2 | 1.5674                                        | 1.5667                                        |
| LJ-3 | 2.1305                                        | 2.1290                                        |
| LJ-4 | 2.6440                                        | 2.6428                                        |

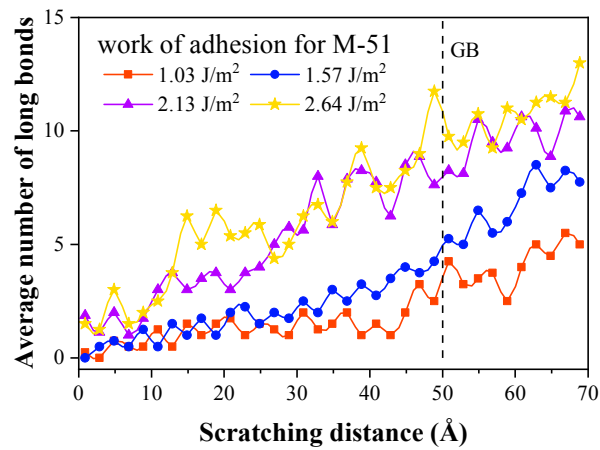

**Fig. S8** Average number of the long Mo-S bonds of M-51 model with different adhesive strengths at the load depth of 4.9 Å.
